# Supplementary material for: Expanded ensemble predictions of absolute binding free energies in the SAMPL9 host–guest challenge
Source: Royal Society of Chemistry journal article supplement (doi:10.1039/d3cp02197a), 2023-01-01
Supplement: d3cp02197a1.pdf [file d3cp02197a1.pdf]

## Supporting Information

### Expanded ensemble predictions of absolute binding free energies in the SAMPL9 host–guest challenge

Matthew F. D. Hurley, Robert M. Raddi, Jason G. Pattis, and Vincent A. Voelz

#### Supporting Tables

**Table S1.** SMILES strings for all host (WP6) and guest microstates

| Index | Guest       | Microstate        | Isomeric SMILES                                                                                |
|-------|-------------|-------------------|------------------------------------------------------------------------------------------------|
| 0     | G1          | 1                 | <chem>C1CCCCC(CCCCC1)N</chem>                                                                  |
| 1     | G1          | 2                 | <chem>C1CCCCC(CCCCC1)[NH3+]</chem>                                                             |
| 2     | G2          | 1                 | <chem>C[N+](C)(C)C(C)C</chem>                                                                  |
| 3     | G3          | 1                 | <chem>[NH3+][C@@H]1C[C@H]2CC[C@@H]1C2</chem>                                                   |
| 4     | G3          | 2                 | <chem>N[C@@H]1C[C@H]2CC[C@H]1C2</chem>                                                         |
| 5     | G3          | 3                 | <chem>[NH2]C1CC2CCC1C2</chem>                                                                  |
| 6     | G3          | 4                 | <chem>[NH3+]C1CC2CCC1C2</chem>                                                                 |
| 7     | G4          | 1                 | <chem>C[Si](C)(C)C[NH3+]</chem>                                                                |
| 8     | G4          | 2                 | <chem>C[Si](C)(C)CN</chem>                                                                     |
| 9     | G5          | 1                 | <chem>CC12CC3(CC(C1)(CC(C2)(C3)[N+](C)(C)C)[N+](C)(C)C)C</chem>                                |
| 10    | G6          | 1                 | <chem>C1CCCC(CCC1)[NH3+]</chem>                                                                |
| 11    | G6          | 2                 | <chem>C1CCCC(CCC1)N</chem>                                                                     |
| 12    | G7          | 1                 | <chem>C1CCC(CC1)N</chem>                                                                       |
| 13    | G7          | 2                 | <chem>C1CCC(CC1)[NH3+]</chem>                                                                  |
| 14    | G8          | 1                 | <chem>C[N+](C)(C)C(=O)O[C-]C1CCCC1</chem>                                                      |
| 15    | G9          | 1                 | <chem>[NH3+]C12CC3CC(C1)CC(O)(C3)C2</chem>                                                     |
| 16    | G9          | 2                 | <chem>[NH2]C12CC3CC(C1)CC(O)(C3)C2</chem>                                                      |
| 17    | G10         | 1                 | <chem>C[N+](C)(C)C1ccc(cc1)C[N+](C)(C)C</chem>                                                 |
| 18    | G11         | 1                 | <chem>CC(C)(C)C[NH3+]</chem>                                                                   |
| 19    | G11         | 2                 | <chem>CC(C)(C)CN</chem>                                                                        |
| 20    | G12         | 1                 | <chem>C[N+](C)(C)[C@H]1[C@@H]2C[C@@H]3C[C@H]1C[C@H](C2)[C@H]3[N+](C)(C)C</chem>                |
| 21    | G12         | 2                 | <chem>C[N+](C)(C)[C@H]1[C@H]2C[C@H]3C[C@@H]1C[C@@H](C2)[C@H]3[N+](C)(C)C</chem>                |
| 22    | G13         | 1                 | <chem>C[n+](C)C1CC(C1)C2CC[n+](C)C2</chem>                                                     |
|       |             |                   | <hr/>                                                                                          |
|       | <b>Host</b> | <b>Net charge</b> |                                                                                                |
| 1     | WP6         | -8                | <chem>O=C([O-])COc1cc2c(OCC(=O)[O-])cc1Cc1cc(OCC(=O)O)c(cc1OCC(=O)[O-])Cc1cc(OCC(=O)[O-</chem> |

---

|   |     |     |                                                                                                                                                                                                                                                                                                                                                |
|---|-----|-----|------------------------------------------------------------------------------------------------------------------------------------------------------------------------------------------------------------------------------------------------------------------------------------------------------------------------------------------------|
|   |     |     | <chem>])c(cc1OCC(=O)O)Cc1cc(OCC(=O)[O-])c(cc1OCC(=O)[O-])Cc1cc(OCC(=O)[O-])c(cc1OCC(=O)O)Cc1cc(OCC(=O)O)c(cc1OCC(=O)[O-])C2O=C([O-])COc1cc2c(OCC(=O)[O-])cc1Cc1cc(OCC(=O)[O-])c(cc1OCC(=O)[O-])Cc1cc(OCC(=O)[O-])c(cc1OCC(=O)O)Cc1cc(OCC(=O)[O-])c(cc1OCC(=O)[O-])Cc1cc(OCC(=O)[O-])c(cc1OCC(=O)[O-])Cc1cc(OCC(=O)[O-])c(cc1OCC(=O)O)C2</chem> |
| 2 | WP6 | -10 |                                                                                                                                                                                                                                                                                                                                                |
| 3 | WP6 | -12 | <chem>O=C([O-])COc1cc2c(OCC(=O)[O-])cc1Cc1cc(OCC(=O)[O-])c(cc1OCC(=O)[O-])Cc1cc(OCC(=O)[O-])c(cc1OCC(=O)[O-])Cc1cc(OCC(=O)[O-])c(cc1OCC(=O)[O-])Cc1cc(OCC(=O)[O-])c(cc1OCC(=O)[O-])Cc1cc(OCC(=O)[O-])c(cc1OCC(=O)[O-])C2</chem>                                                                                                                |

## Supporting Figures

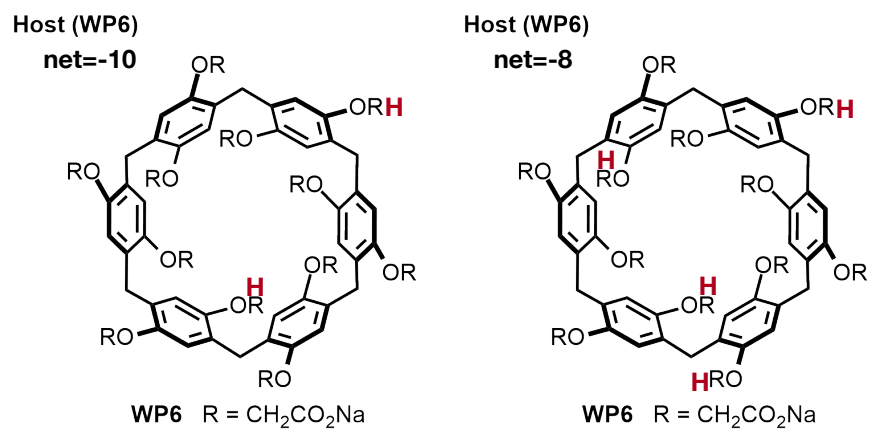

**Figure S1.** Protonation states used for WP6 microstates with net charge -10e (left) and -8e (right).

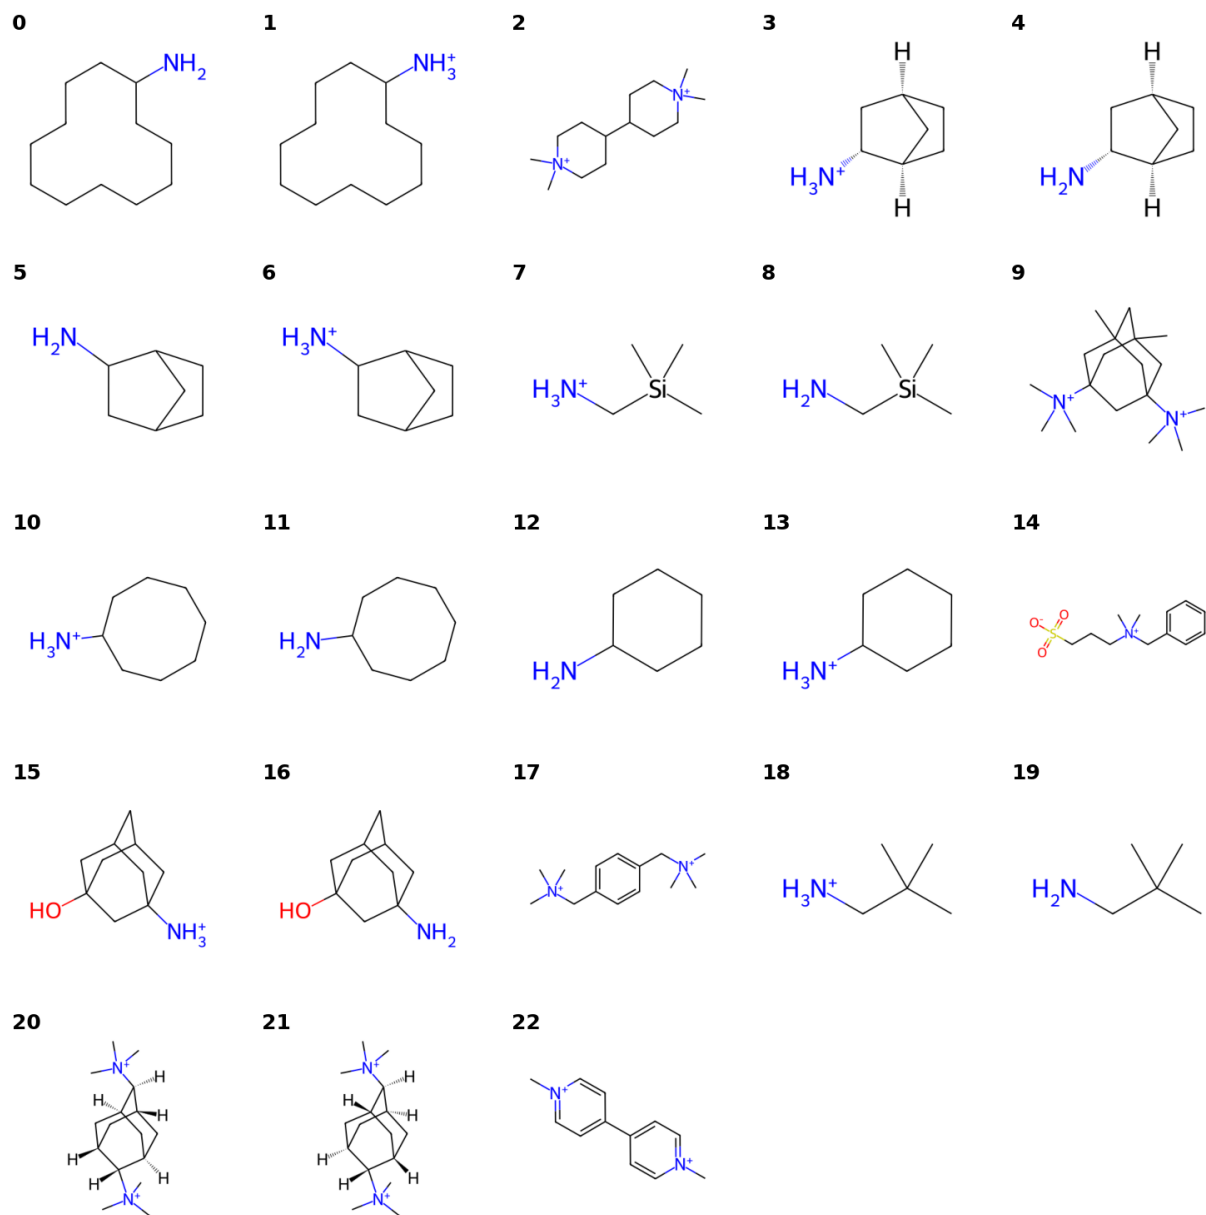

**Figure S2.** Chemical structures for all microstates. Labels correspond to the indices found in Table S1.
